# Supplementary material for: Dual nanocomposite carrier transport layers enhance the efficiency of planar perovskite photovoltaics
Source: Royal Society of Chemistry journal article supplement (doi:10.1039/c8ra01532e), 2018-01-01
Supplement: c8ra01532e1.pdf [file c8ra01532e1.pdf]

## Supporting Information

### **Dual nanocomposite carrier transport layers enhance the efficiency of planar perovskite photovoltaics**

*Hsi-Kuei Lin<sup>a</sup>, Jia-Xing Li<sup>b</sup>, Hao-Zheng Wang<sup>a</sup>, Yu-Wei Su<sup>c</sup>, Kaung-Hsiung Wu<sup>b</sup> and Kung-Hwa Wei<sup>\*a</sup>*

<sup>a</sup> Department of Materials Science and Engineering, National Chiao Tung University, 300 Hsinchu, Taiwan

<sup>b</sup> Department of Electrophysics, National Chiao Tung University, 300 Hsinchu, Taiwan

<sup>c</sup> Department of Chemical Engineering, Feng Chia University, Taichung 40724, Taiwan

\*E-mail: [khwei@mail.nctu.edu.tw](mailto:khwei@mail.nctu.edu.tw)

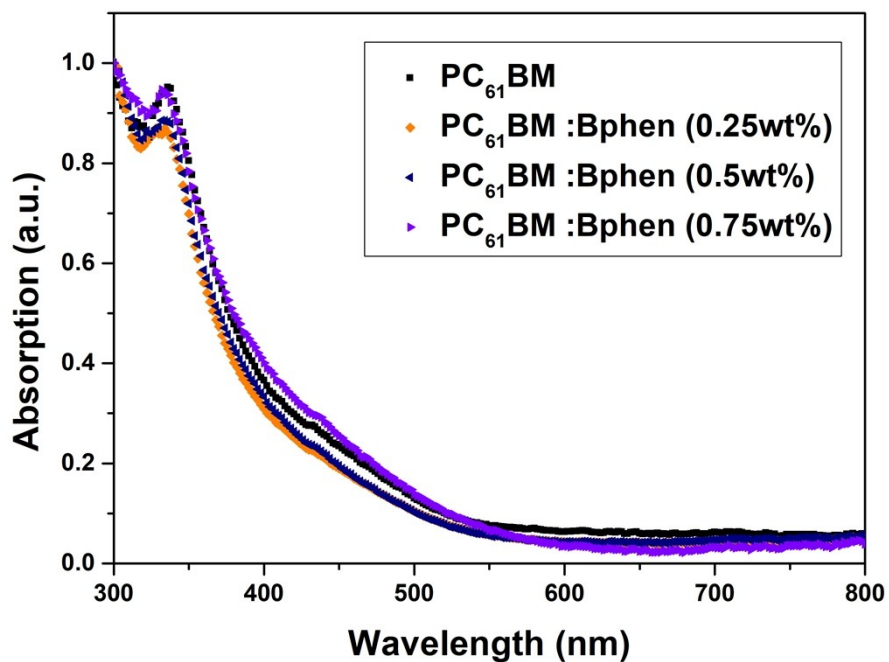

**Fig. S1** UV-vis absorption spectra of PC<sub>61</sub>BM incorporating Bphen at various contents (0, 0.25, 0.375, 0.5 wt%).

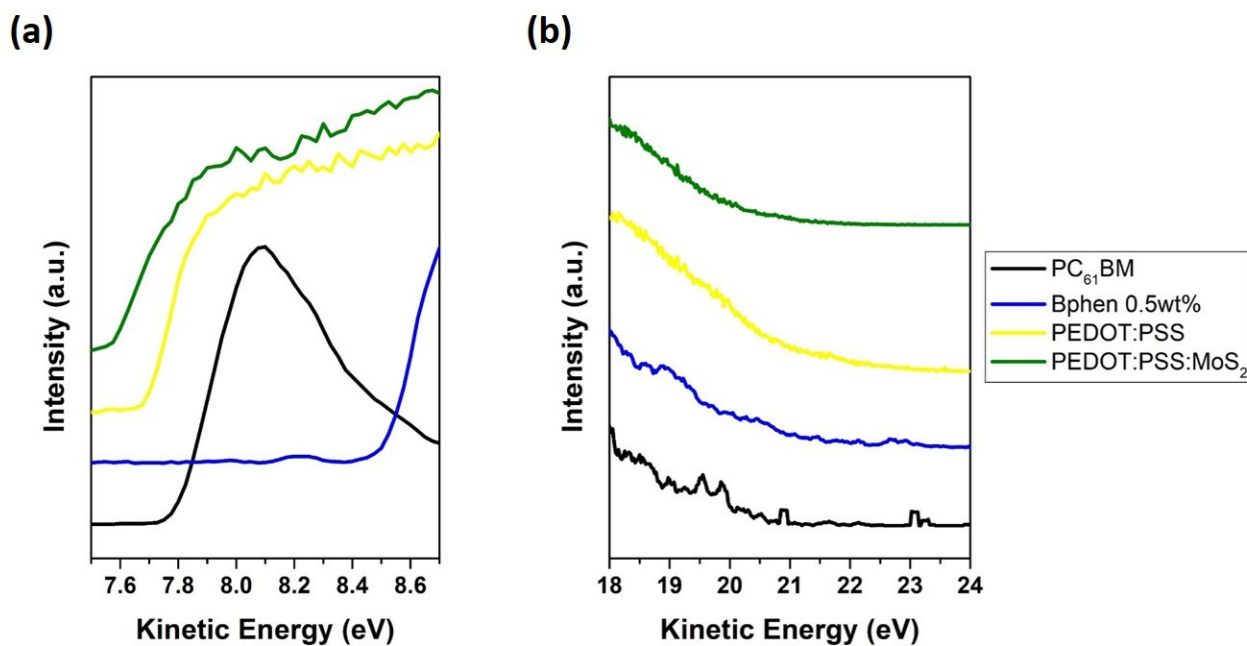

**Fig. S2** UPS spectra of PC<sub>61</sub>BM, PC<sub>61</sub>BM:Bphen(0.5wt%), PEDOT:PSS and PEDOT:PSS:MoS<sub>2</sub>(0.1 wt%) in (a) cutoff energy regions and (b) onset energy regions.

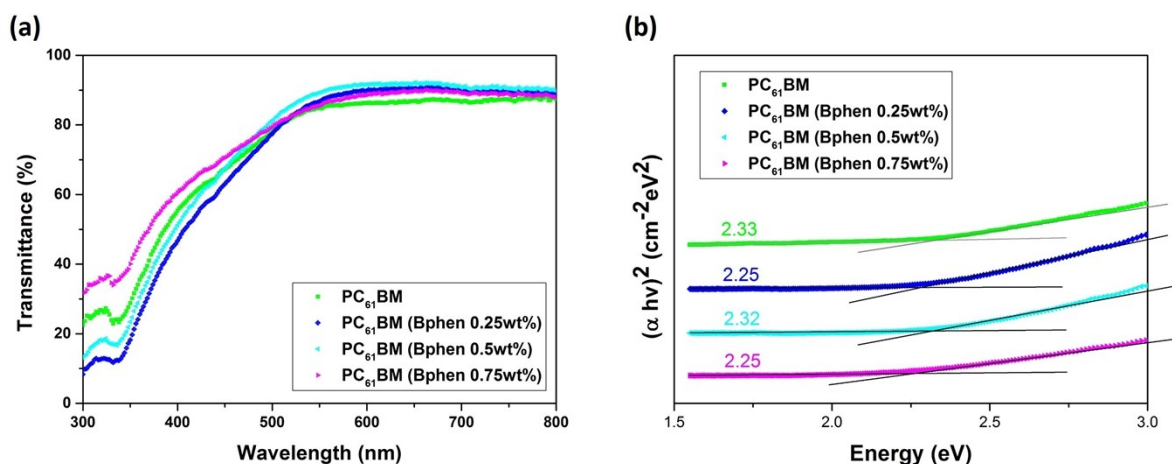

**Fig. S3** (a) UV-Vis transmission spectra of films processed using PC<sub>61</sub>BM incorporating Bphen at various contents (0, 0.25, 0.375, 0.5 wt%). (b) Energy gap in PC<sub>61</sub>BM incorporating Bphen at various contents (0, 0.25, 0.375, 0.5 wt%) by calculating through a Tauc plot.

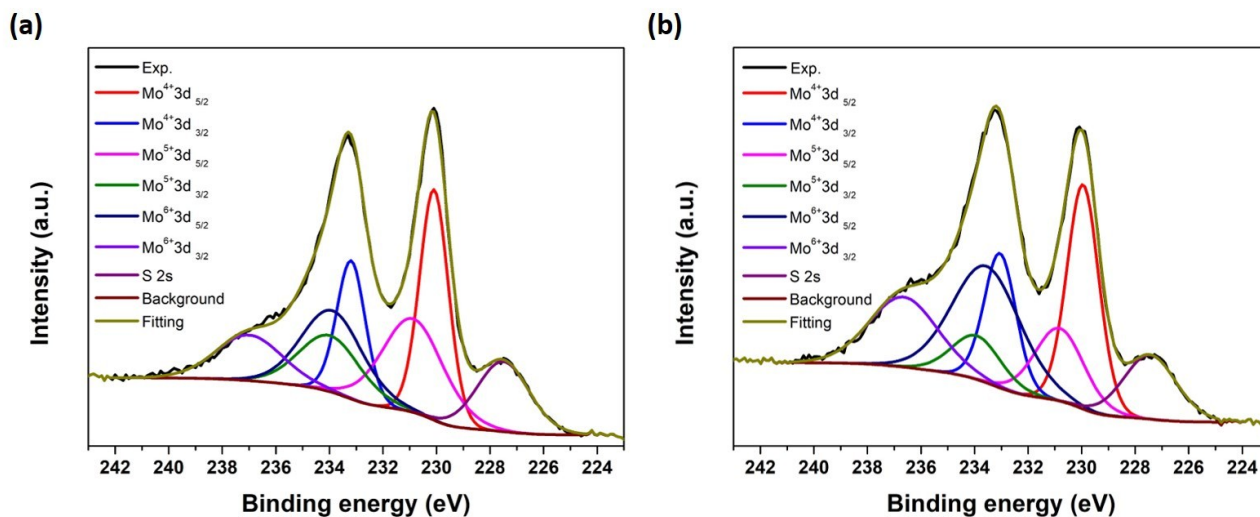

| XPS area ratio (%)            | Mo <sup>4+</sup> | Mo <sup>5+</sup> | Mo <sup>6+</sup> | S 2s |
|-------------------------------|------------------|------------------|------------------|------|
| MoS <sub>2</sub>              | 33.7             | 29.2             | 25.5             | 11.6 |
| MoS <sub>2</sub> UV treatment | 34.5             | 17.3             | 38.1             | 10.1 |

**Fig. S4** XPS narrow-scan spectra (Mo 3d) of perovskite films prepared (a) with and (b) without UV-ozone treatment; (c) XPS area ratios of chemical states of Mo species.

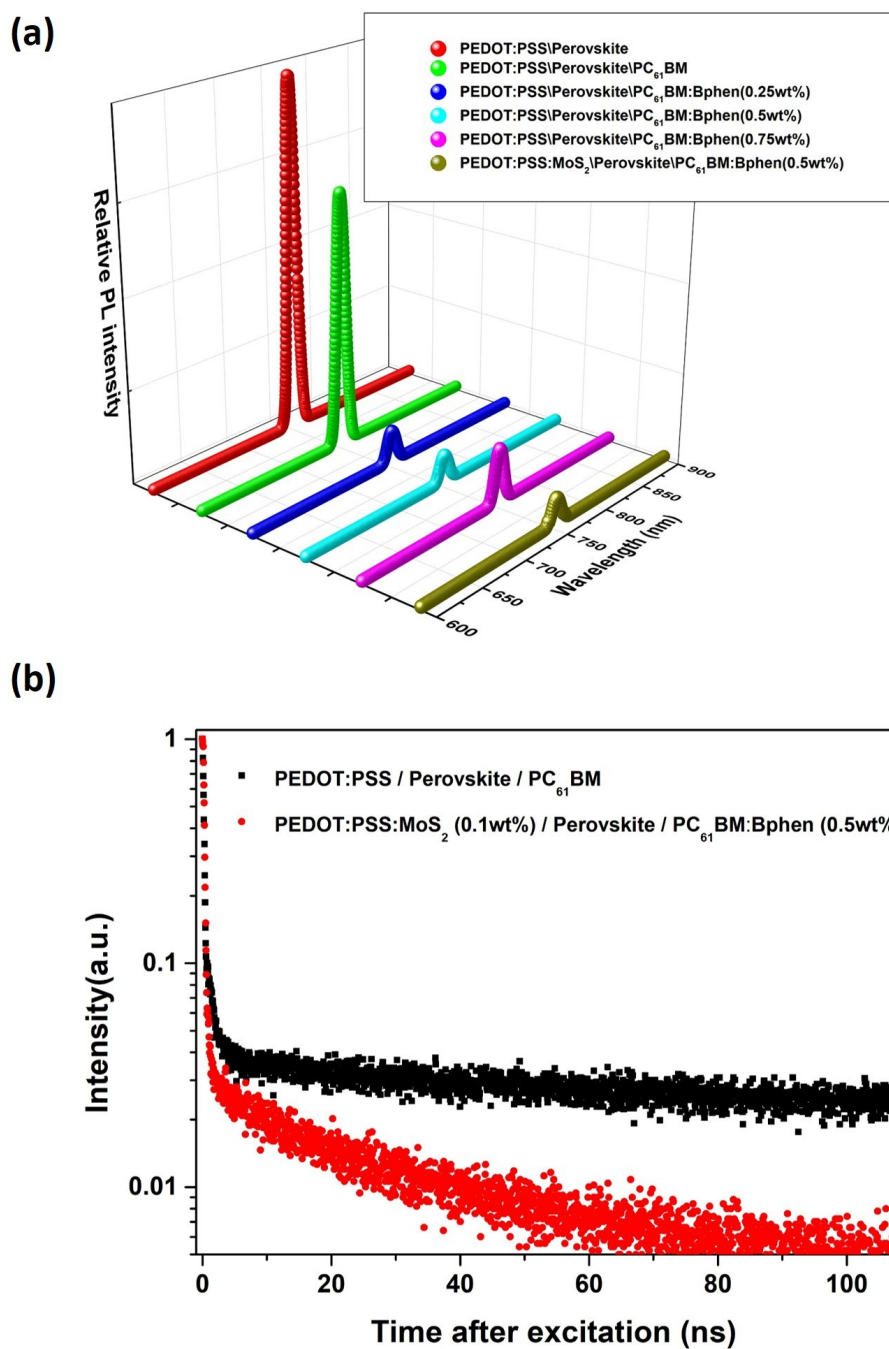

**Fig. S5** (a) steady state PL spectra of films processed using PEDOT:PSS/perovskite, PEDOT:PSS/perovskite/ $\text{PC}_{61}\text{BM}$  incorporating Bphen at various contents (0, 0.25, 0.5, 0.75 wt%) and PEDOT:PSS $\text{MoS}_2$  (0.1wt%)/Perovskite/ $\text{PC}_{61}\text{BM}$ :Bphen (0.5wt%). (b) time-resolved photoluminescence (TRPL) spectra of PEDOT:PSS/perovskite/ $\text{PC}_{61}\text{BM}$  and PEDOT:PSS $\text{MoS}_2$  (0.1wt%)/Perovskite/ $\text{PC}_{61}\text{BM}$ :Bphen (0.5wt%).

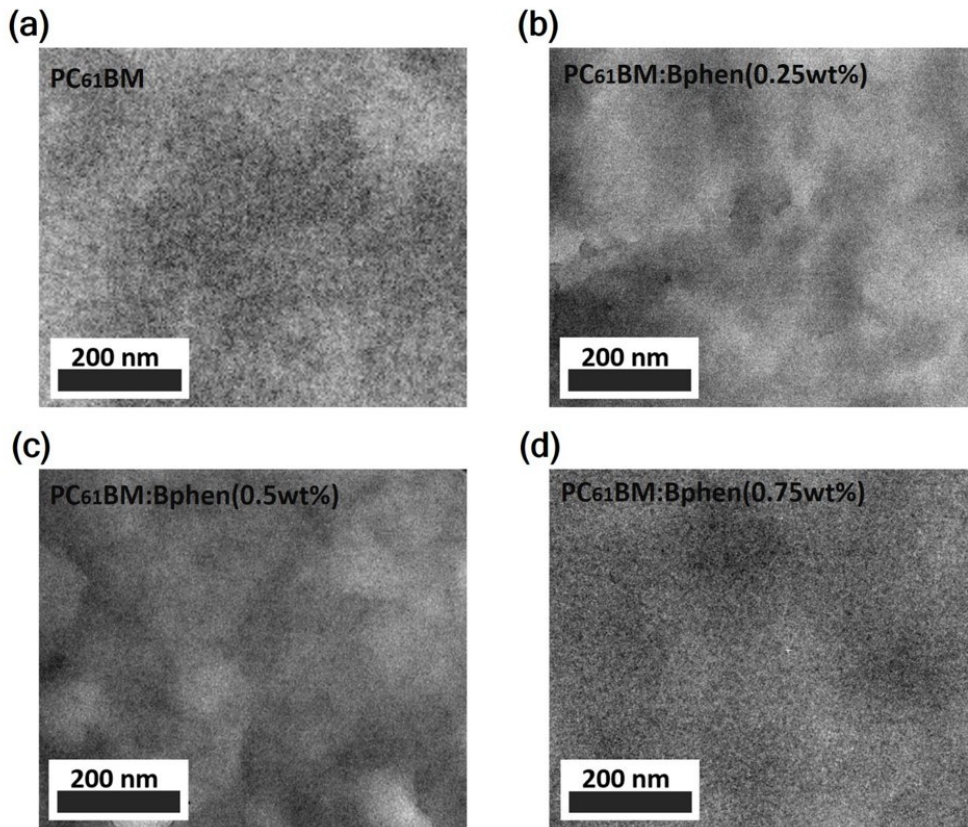

**Fig. S6** TEM images of PC<sub>61</sub>BM films incorporating Bphen at various contents (0.25, 0.5, 0.75 wt%).

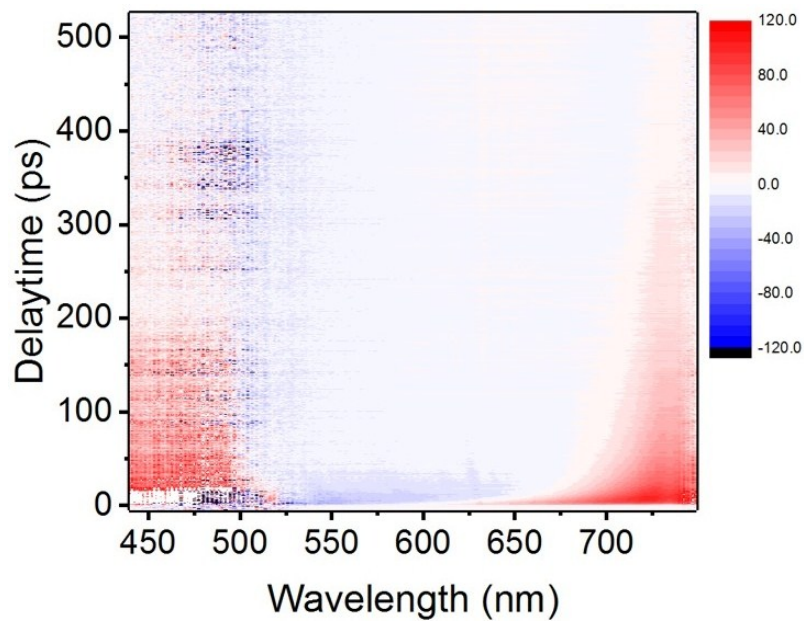

**Fig. S7** 2-D plots of ultrafast transient absorption difference  $\Delta A$  on ITO/PEDOT:PSS/CH<sub>3</sub>NH<sub>3</sub>PbI<sub>3-x</sub>Cl<sub>x</sub>/PC<sub>61</sub>BM.

**Table S2** Fitting parameters of 1-D GISAXS profiles of the PC<sub>61</sub>BM:x wt% Bphen (x = 0, 0.25, 0.5 and 0.75)

| Parameter                                 | PC <sub>61</sub> BM | PC <sub>61</sub> BM: x wt% Bphen |         |          |
|-------------------------------------------|---------------------|----------------------------------|---------|----------|
|                                           |                     | x = 0.25                         | x = 0.5 | x = 0.75 |
| Φ: volume fraction                        | 3E-4                | 9.12E-4                          | 8.2E-3  | 7.9E-3   |
| R: mean radius (Å)                        | 5.7                 | 5.5                              | 5.1     | 4.8      |
| Df: fractal dimension                     | 2.39                | 2.67                             | 2.56    | 2.55     |
| ξ: correlation length(Å)                  | 472                 | 312                              | 308     | 304      |
| SLD sphere (Å <sup>-2</sup> )             | 4.1E-6              | 4.1E-6                           | 4.10E-6 | 4.1E-6   |
| SLD solvent (Å <sup>-2</sup> )            | 4.7E-6              | 4.7E-6                           | 4.70E-6 | 4.7E-6   |
| bkg (cm <sup>-1</sup> sr <sup>-1</sup> ). | 7E-4                | 5E-4                             | 5E-4    | 7E-4     |
| Domain size: Rg (nm)                      | 95                  | 69                               | 66      | 65       |

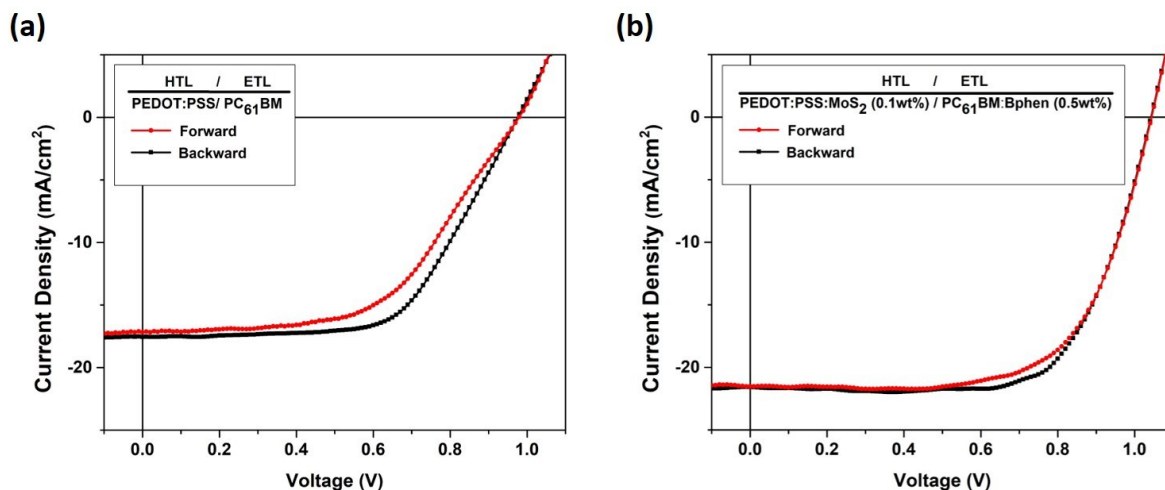

**Fig. S8** Current density–voltage (J–V) characteristic curves of the perovskite solar cells at forward scan and backward scan for control device and doubly modified with carrier transport layers device.
